# Supplementary material for: Perifosine as a potential novel anti-telomerase therapy
Source: PubMed Central journal article supplement (PMC4673128; doi:10.18632/oncotarget.5200), 2015-08-15
Supplement: oncotarget-06-21816-s001.pdf [file oncotarget-06-21816-s001.pdf]

# Perifosine as a potential novel anti-telomerase therapy

## Supplementary Material

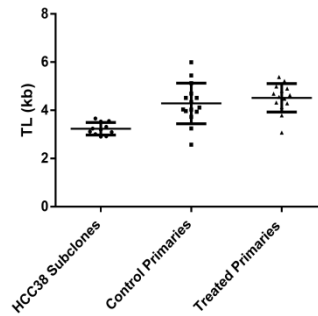

**Figure S1: telomere length in primary tumors compared with subclones of HCC38.** Mean telomere length in both control and treated primary tumors was longer than subclones of the parental HCC38+LUC+GFP population, suggesting that the difference in telomere length between the parent population and the primary tumors was not due to a founder effect.

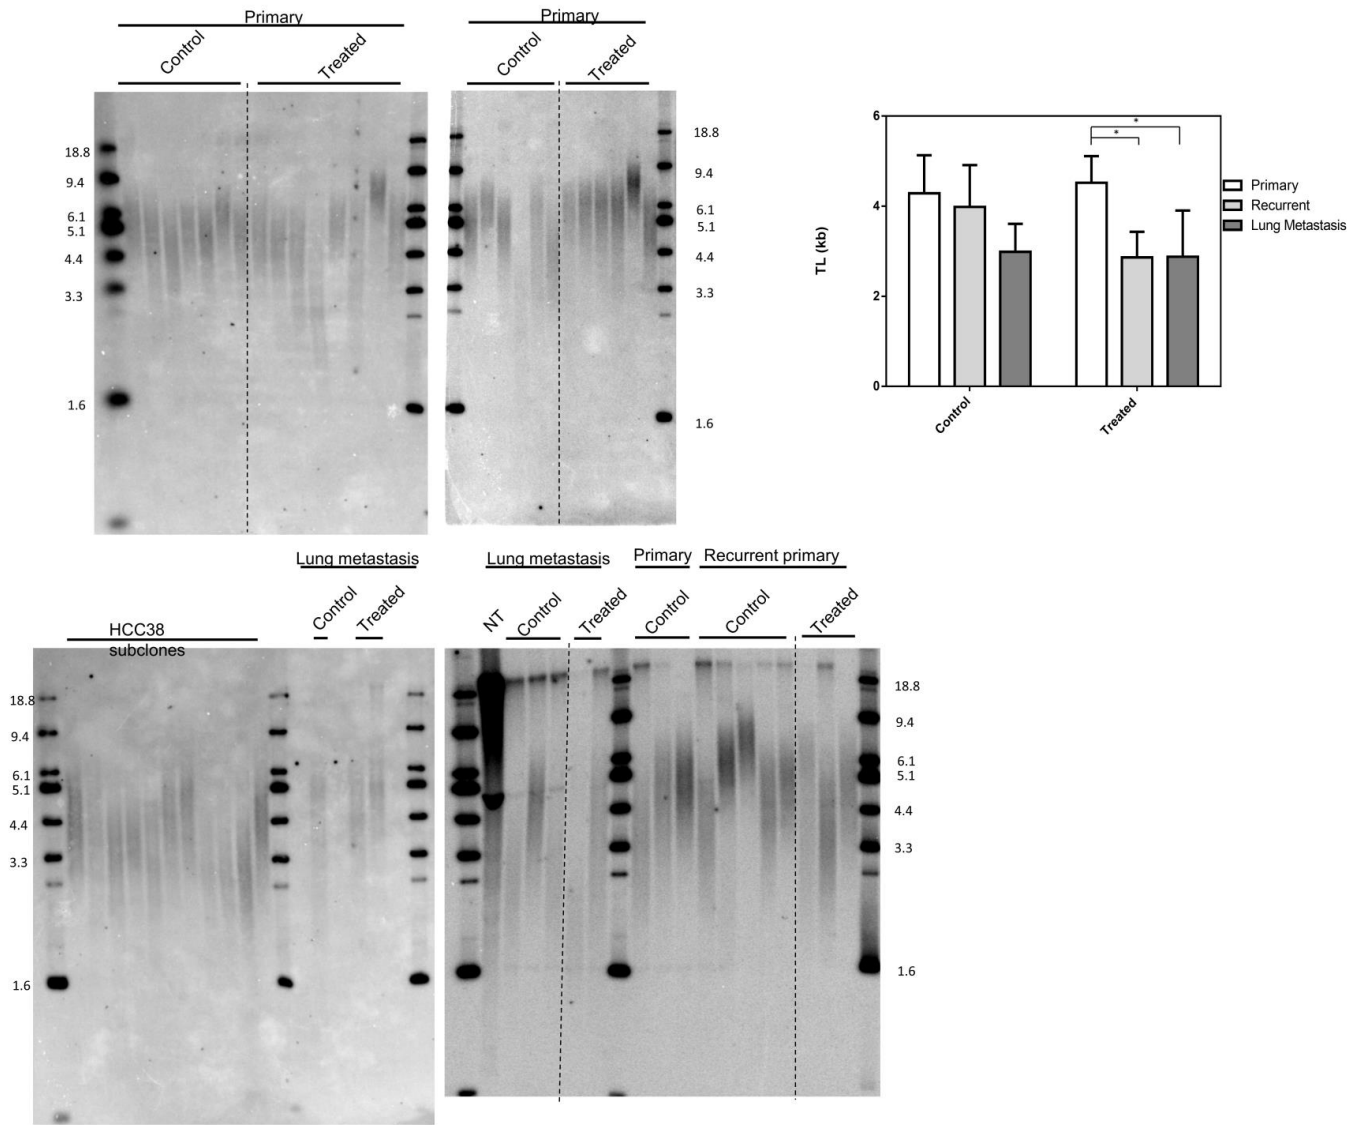

**Figure S2: Terminal Restriction Fragment (TRF) primary data for figure 2.** Mean telomere length was computed as described in [37]; the band indicative of mouse cell contamination is clearly visible in telomeric DNA extracted from a non-tumor-bearing mouse lung (NT, middle right gel).

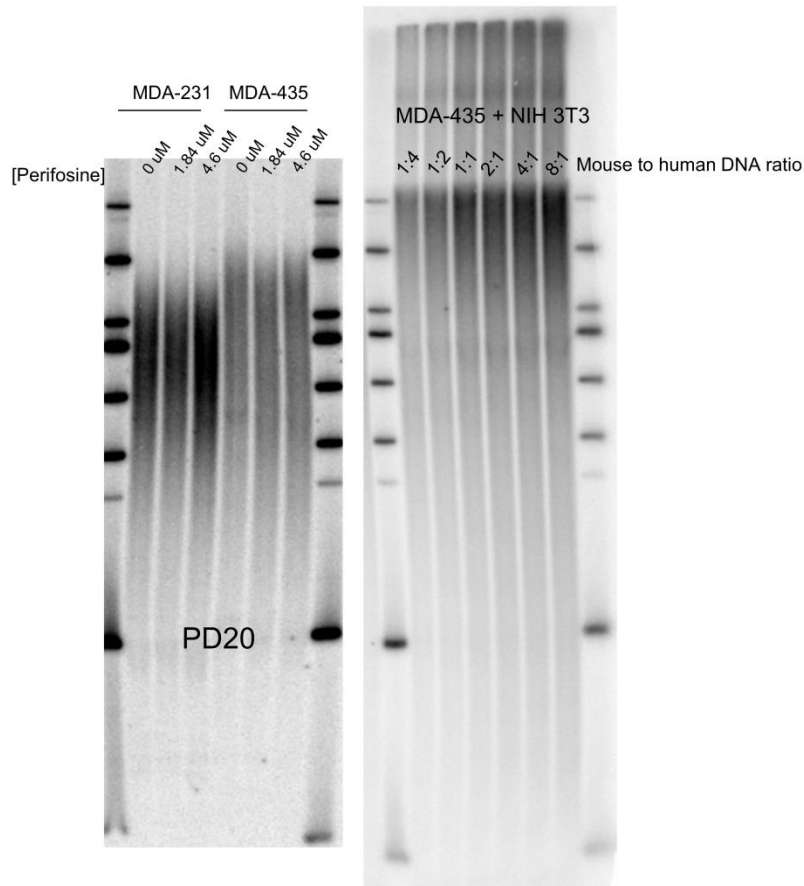

**Figure S3: Small quantities of murine DNA can dramatically bias measurement cancer cell telomere length.** Varying ratios of DNA purified from mouse NIH 3T3 cells to human MDA-MB-435 cells DNA were mixed prior to TRF digestion and analysis. Small quantities of mouse DNA (20% by mass, a ratio of 1:4 mouse to human) were sufficient to bias measurement of MDA-MB-435 cells (right panel) compared with measurement of MDA-MB-435 cells alone (left panel).

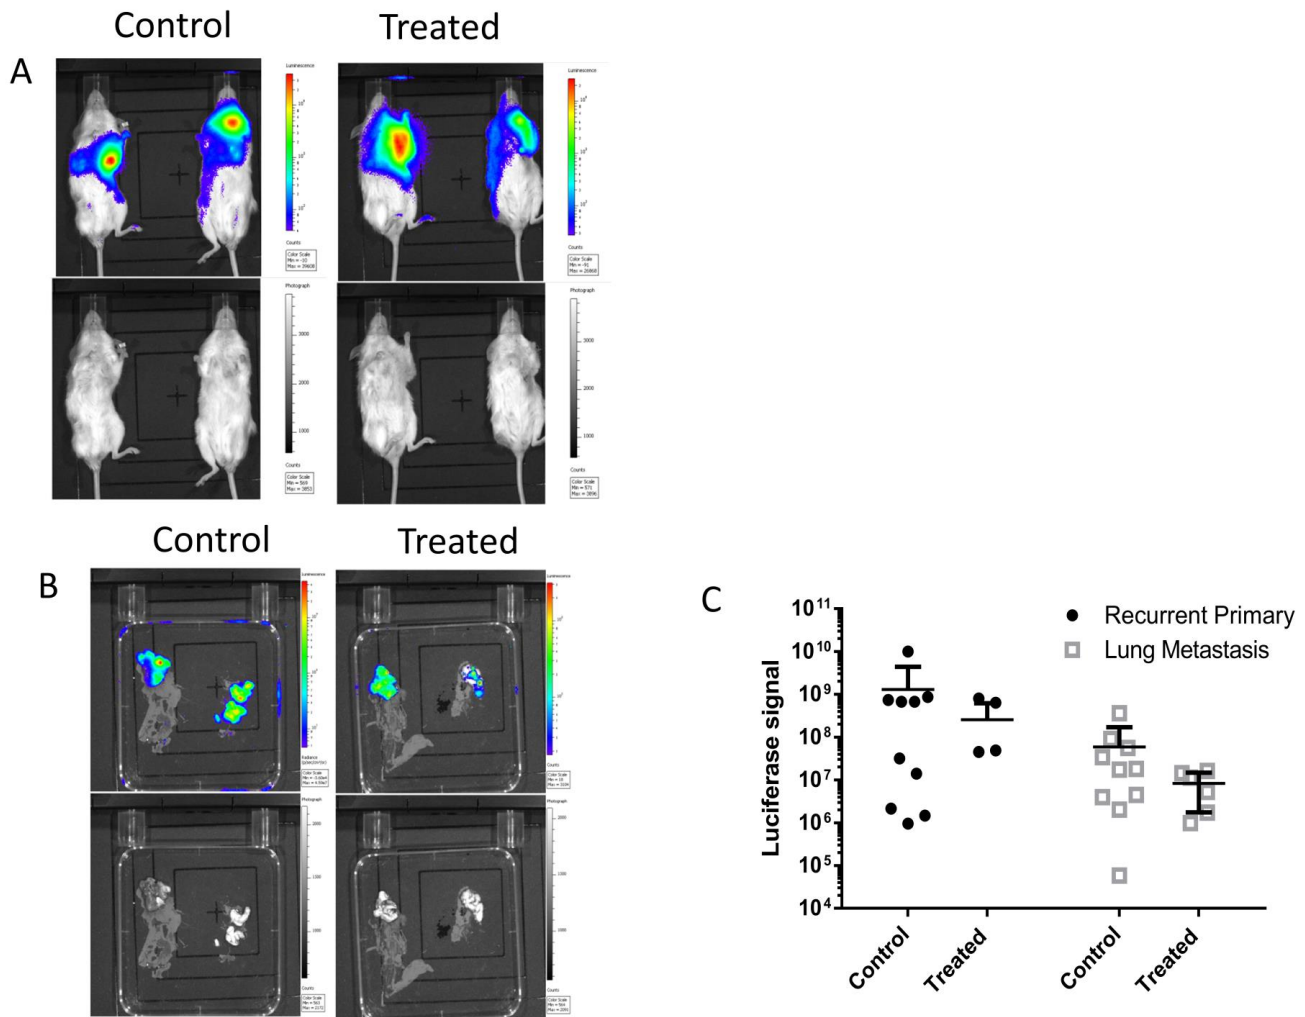

**Figure S4: Representative pictures of bioluminescence signal from recurrent primary and lung metastatic tumors.** There was no statistically significant difference in tumor burden between control and Perifosine-treated mice as measured by bioluminescence signal in either recurrent primary (A) or metastatic tumors (B).

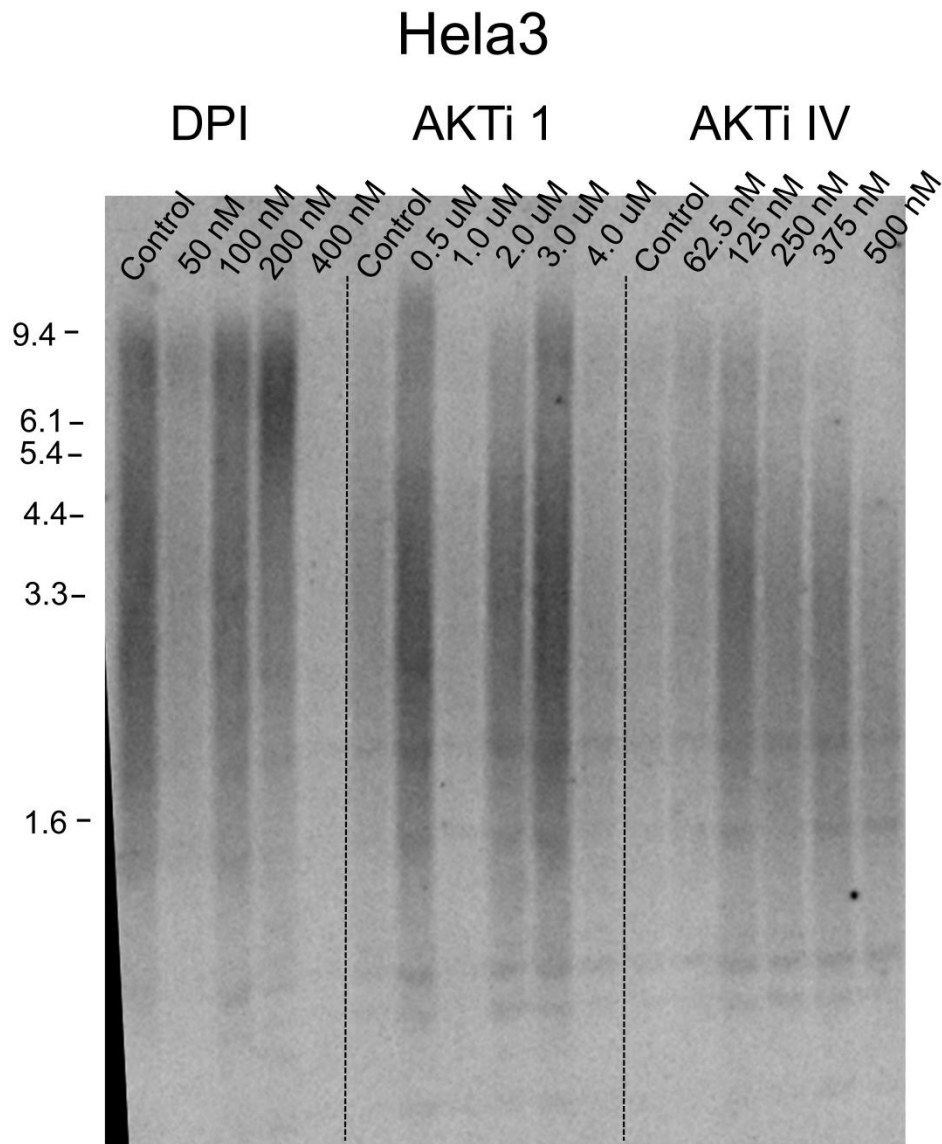

**Figure S5: Tests for telomere shortening in HeLa cells exposed to other AKT inhibitors.** HeLa cells treated with sub-lethal concentrations of AKT inhibitor IV exhibit telomere shortening over time, while cells treated with AKT inhibitor I and the Dual Pathway Inhibitor did not exhibit telomere shortening.

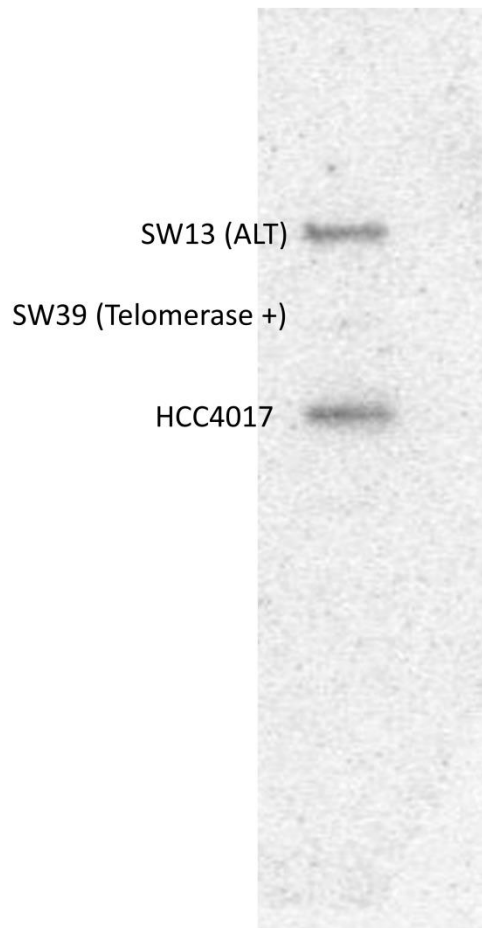

**Figure S6: C-circle assay on HCC4017.** HCC4017 exhibited a number of c-circles consistent with document Alternative Lengthening of Telomeres (ALT)-utilizing cell lines.

**Table S1: Summary of *in vitro* data.** A summary of the cells lines evaluated for changes in telomere length between untreated and the highest measured dose of Perifosine for each cell line (middle) as well as a summary of the change in telomerase enzymatic activity in each cell line (right column).

| Cell Line  | Telomere Length | Telomerase activity |
|------------|-----------------|---------------------|
| HCC4017    | Unchanged       | Increased           |
| H2087      | Lengthening     | Increased           |
| HCC827     | Unchanged       | Decreased           |
| H2009      | Shortening      | Unchanged           |
| H2882      | Shortening      | Decreased           |
| HCC15      | Shortening      | Increased           |
| H1819      | Shortening      | Unchanged           |
| HCC515     | Unchanged       | Unchanged           |
| HCC2429    | Shortening      | Decreased           |
| Hela       | Shortening      | Decreased           |
| HT1080     | Lengthening     | N/A                 |
| H1993      | Shortening      | N/A                 |
| H2073      | Shortening      | N/A                 |
| HCC95      | Unchanged       | N/A                 |
| MDA-MB-231 | Shortening      | N/A                 |
| MDA-MB-435 | Shortening      | N/A                 |
| DLD1       | Shortening      | N/A                 |
| A375       | Unchanged       | N/A                 |
| HCC38      | Shortening      | N/A                 |
| H1299      | Unchanged       | N/A                 |
